# Supplementary material
Source: PubMed Central journal article supplement (PMC4416979)
Supplement: NIHMS640954-supplement.pdf [file NIHMS640954-supplement.pdf]

## The Genetics of Impulsivity: Evidence for the Heritability of Delay Discounting

### Supplemental Information

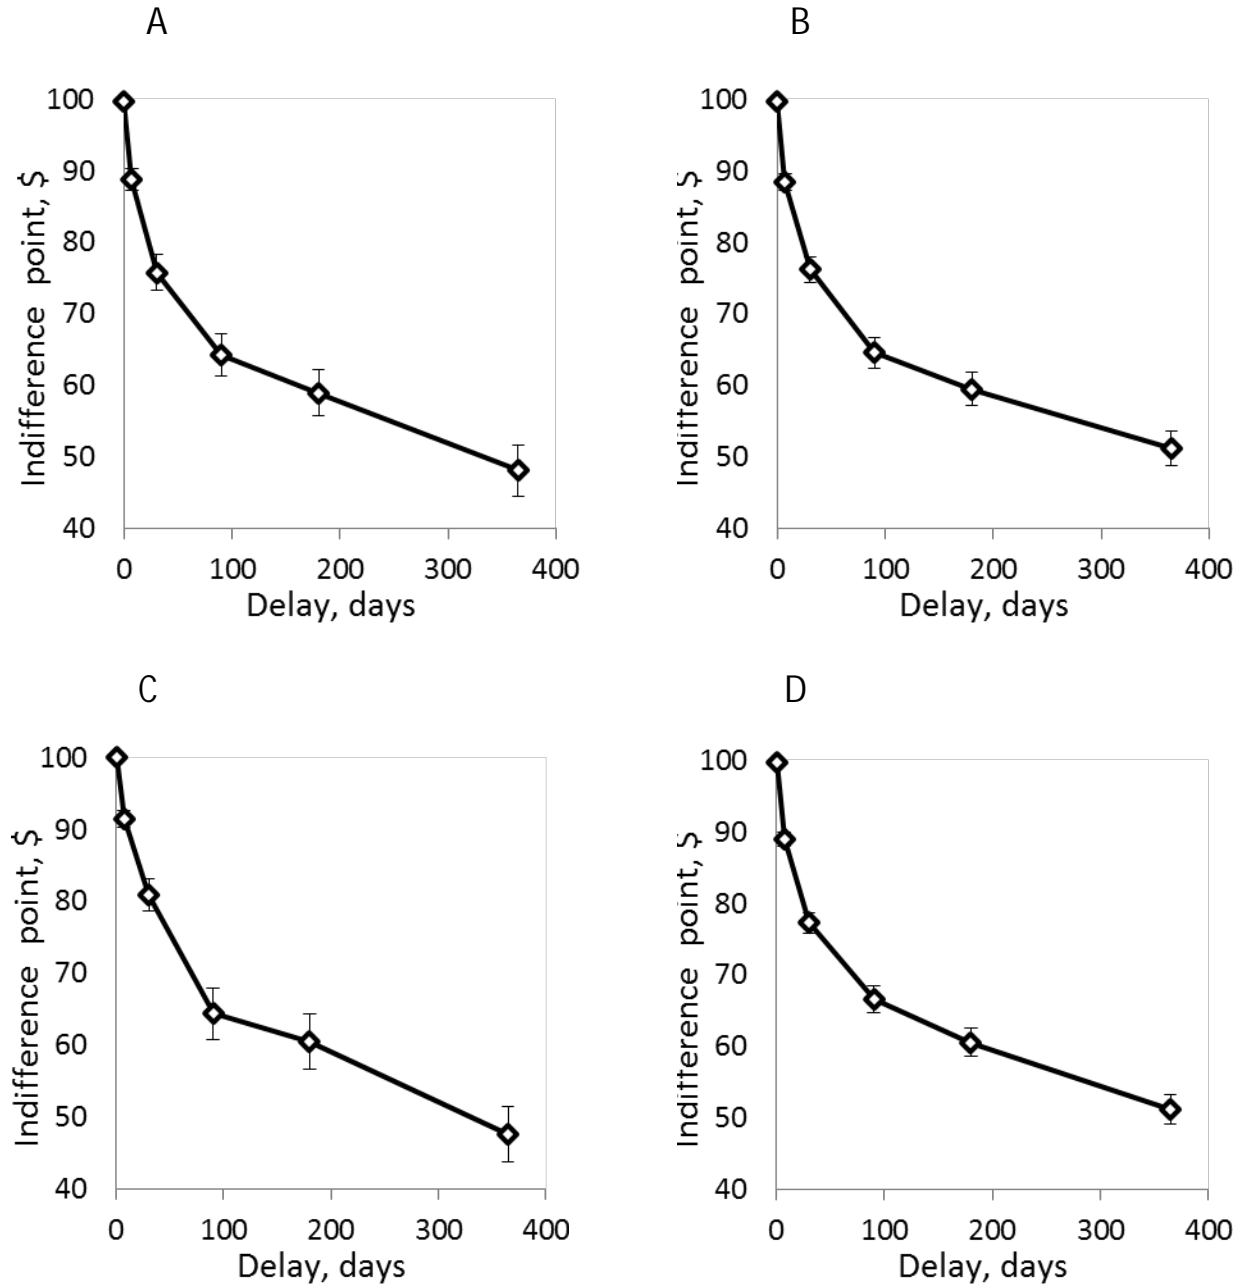

**Figure S1.** Discounting of \$100 amount as a function of delay to its receipt, by age and zygosity groups. Horizontal axis: delay in days; line markers indicate delays of 0, 7, 30, 90, 180, and 365 days. Vertical axis: Indifference points indicating subjective value of the \$100 amount at each of the delays. Whiskers indicate standard error. **(A)** Age16, monozygotic twins (MZ); **(B)** Age18, MZ; **(C)** Age16, dizygotic twins (DZ); **(D)** Age 18, DZ. The goodness of fit of the hyperbolic model to these empirical data ( $R^2$ ) is .80, .74, .88, and .77 for A, B, C, and D, respectively.
